# Supplementary material for: Counter electrode materials combined with redox couples in dye- and quantum dot-sensitized solar cells
Source: Royal Society of Chemistry journal article supplement (doi:10.1039/c5ta03682h), 2015-01-01
Supplement: c5ta03682h1.pdf [file c5ta03682h1.pdf]

## Supplementary Information

### Counter electrode materials combined with redox couples in dye- and quantum dot-sensitized solar cells

Mingxing Wu,<sup>\*a</sup> Xiao Lin,<sup>b</sup> Yudi Wang,<sup>c</sup> and Tingli Ma<sup>\*d</sup>

<sup>a</sup>College of Chemistry and Material Science, Hebei Normal University, No. 20 Rd. East of 2nd Ring South, Yuhua District, Shijiazhuang City, Hebei Province, 050024, P. R. China, E-mail: mingxing@mail.ustc.edu.cn, Tel. & Fax: +86-311-80787438

<sup>b</sup>Shanghai Institute of Applied Physics, Chinese Academy of Sciences, Jialuo Road 2019, Shanghai, 201800, P. R. China

<sup>c</sup>State Key Laboratory of Inorganic Synthesis and Preparative Chemistry, College of Chemistry, Jilin University, Qianjin Street 2699, Changchun, 130012, P. R. China

<sup>d</sup>Graduate School of Life Science and Systems Engineering, Kyushu Institute of Technology, 2-4 Hibikino, Wakamatsu, Kitakyushu, Fukuoka 808-0196, Japan E-mail: tinglima@dlut.edu.cn

**Table S1.** Experimental conditions and results about the inorganic iodide-free redox couples based DSCs using different counter electrode catalysts.

| CE catalysts | Substrate | Redox couples                                       | Dye    | FF    | PCE/% | Ref. |
|--------------|-----------|-----------------------------------------------------|--------|-------|-------|------|
| Pt           | FTO glass | Br <sup>-</sup> /Br <sub>3</sub> <sup>-</sup>       | TC-306 | 0.781 | 5.22  | 10   |
| Pt           | FTO glass | SeCN <sup>-</sup> /(SeCN) <sub>3</sub> <sup>-</sup> | Z907   | 0.735 | 7.50  | 12   |
| Pt           | FTO glass | S <sup>2-</sup> /S <sub>x</sub> <sup>2-</sup>       | TH-305 | 0.705 | 4.55  | 13   |
| CoS          | FTO glass | S <sup>2-</sup> /S <sub>x</sub> <sup>2-</sup>       | TH-305 | 0.653 | 5.24  | 13   |

**Table S2.** Experimental conditions and results about the organic redox couples based DSCs using different counter electrode catalysts.

| CE catalysts | Substrate | Redox couples            | Dye   | FF    | PCE/% | Ref.   |
|--------------|-----------|--------------------------|-------|-------|-------|--------|
| Pt           | FTO glass | TMEPO/TMEPO <sup>+</sup> | D149  | 0.70  | 5.4   | 14a    |
| Pt           | FTO glass | PTZ/Co-complex           | Z907  | 0.44  | 1.44  | 14b    |
| Pt           | FTO glass | TPD/TPD <sup>+</sup>     | N3    | /     | <1%   | 14c    |
| Pt           | FTO glass | HQ/BQ                    | N719  | 0.591 | 4.7   | 14e,f  |
| PEDOT        | FTO glass | HQ/BQ                    | N719  | 0.667 | 5.2   | 14e,f  |
| MWCNTs       | FTO glass | HQ/BQ                    | N719  | 0.635 | 4.9   | 14 e,f |
| Pt           | FTO glass | HQ/BQ                    | CM309 | 0.576 | 5.2   | 14e,f  |
| PEDOT        | FTO glass | HQ/BQ                    | CM309 | 0.678 | 6.2   | 14e,f  |
| MWCNTs       | FTO glass | HQ/BQ                    | CM309 | 0.727 | 5.8   | 14e,f  |

**Table S3.** Experimental conditions and results about the organic of T-/T<sub>2</sub> (R=me) redox couples based DSCs using different counter electrode catalysts.

| CE catalyst                        | Substrate | Redox couple      | Dye  | FF    | PCE/% | Ref. |
|------------------------------------|-----------|-------------------|------|-------|-------|------|
| Pt                                 | FTO glass | T-/T <sub>2</sub> | Z907 | 0.75  | 6.48  | 14g  |
| CoS                                | FTO glass | T-/T <sub>2</sub> | N719 | 0.49  | 4.6   | 14h  |
| PEDOT                              | FTO glass | T-/T <sub>2</sub> | N719 | 0.70  | 6.9   | 14h  |
| PEDOT                              | ITO/PEN   | T-/T <sub>2</sub> | N719 | 0.65  | 5.9   | 14h  |
| PEDOT                              | FTO glass | T-/T <sub>2</sub> | Z907 | 0.72  | 7.9   | 14h  |
| Pt                                 | FTO glass | T-/T <sub>2</sub> | N719 | 0.48  | 3.66  | 7a   |
| TiC                                | FTO glass | T-/T <sub>2</sub> | N719 | 0.63  | 4.96  | 7a   |
| VC                                 | FTO glass | T-/T <sub>2</sub> | N719 | 0.54  | 4.06  | 7a   |
| Cr <sub>3</sub> C <sub>2</sub>     | FTO glass | T-/T <sub>2</sub> | N719 | 0.65  | 4.54  | 7a   |
| WC                                 | FTO glass | T-/T <sub>2</sub> | N719 | 0.56  | 5.10  | 7g   |
| Mo <sub>2</sub> C-P                | FTO glass | T-/T <sub>2</sub> | N719 | 0.633 | 5.50  | 7b   |
| Mo <sub>2</sub> C-NTs              | FTO glass | T-/T <sub>2</sub> | N719 | 0.694 | 6.22  | 7b   |
| VN cubes                           | FTO glass | T-/T <sub>2</sub> | N719 | 0.64  | 4.95  | 7c   |
| VN peas                            | FTO glass | T-/T <sub>2</sub> | N719 | 0.68  | 5.57  | 7c   |
| WO <sub>2</sub>                    | FTO glass | T-/T <sub>2</sub> | N719 | 0.57  | 4.66  | 7d   |
| WO <sub>2.72</sub>                 | FTO glass | T-/T <sub>2</sub> | N719 | 0.71  | 5.05  | 7h   |
| WO <sub>3</sub>                    | FTO glass | T-/T <sub>2</sub> | N719 | 0.64  | 4.17  | 7h   |
| MoS <sub>2</sub>                   | FTO glass | T-/T <sub>2</sub> | N719 | 0.63  | 4.97  | 7e   |
| WS <sub>2</sub>                    | FTO glass | T-/T <sub>2</sub> | N719 | 0.64  | 5.24  | 7e   |
| Ni <sub>5</sub> P <sub>4</sub>     | FTO glass | T-/T <sub>2</sub> | N719 | 0.54  | 3.87  | 7f   |
| Ca                                 | FTO glass | T-/T <sub>2</sub> | N719 | 0.57  | 4.96  | 7g   |
| Cb                                 | FTO glass | T-/T <sub>2</sub> | N719 | 0.58  | 5.09  | 7g   |
| Cd                                 | FTO glass | T-/T <sub>2</sub> | N719 | 0.57  | 4.75  | 7g   |
| MC                                 | FTO glass | T-/T <sub>2</sub> | N719 | 0.53  | 4.60  | 7d   |
| SCS <sup>[a]</sup>                 | FTO glass | T-/T <sub>2</sub> | N719 | 0.63  | 5.4   | 16a  |
| HCS <sup>[b]</sup>                 | FTO glass | T-/T <sub>2</sub> | N719 | 0.65  | 5.8   | 16a  |
| OCS <sup>[c]</sup>                 | FTO glass | T-/T <sub>2</sub> | N719 | 0.70  | 6.4   | 16a  |
| VASWCNTs                           | FTO glass | T-/T <sub>2</sub> | N719 | 0.68  | 5.25  | 16b  |
| CNTs                               | FTO glass | T-/T <sub>2</sub> | N719 | 0.69  | 7.33  | 16c  |
| Graphite                           | FTO glass | T-/T <sub>2</sub> | N719 | 0.59  | 4.79  | 16d  |
| VC-MC                              | FTO glass | T-/T <sub>2</sub> | N719 | 0.63  | 5.15  | 7a   |
| WC-MC                              | FTO glass | T-/T <sub>2</sub> | N719 | 0.57  | 5.34  | 7g   |
| WO <sub>2</sub> -MC                | FTO glass | T-/T <sub>2</sub> | N719 | 0.63  | 5.22  | 7d   |
| Ni <sub>5</sub> P <sub>4</sub> -MC | FTO glass | T-/T <sub>2</sub> | N719 | 0.64  | 4.75  | 7f   |
| Cb/Pt                              | FTO glass | T-/T <sub>2</sub> | C106 | 0.67  | 7.0   | 17   |
| Cb/PPy                             | FTO glass | T-/T <sub>2</sub> | C106 | 0.49  | 5.2   | 17   |
| Cb/PANI                            | FTO glass | T-/T <sub>2</sub> | C106 | 0.46  | 5.2   | 17   |
| Cb/PEDOT                           | FTO glass | T-/T <sub>2</sub> | C106 | 0.70  | 7.6   | 17   |

<sup>[a]</sup>Solid carbon sphere; <sup>[b]</sup>Hollow carbon sphere; <sup>[c]</sup>Open ended carbon sphere

**Table S4.** Experimental conditions and results about the organic of T-/T<sub>2</sub> (R=other units) redox couples based DSCs using different counter electrode catalysts.

| CE catalyst                        | Substrate | R group of the redox couple,  | Dye  | FF    | PCE/% | Ref. |
|------------------------------------|-----------|-------------------------------|------|-------|-------|------|
| Pt                                 | FTO glass | <i>p</i> -phenyl              | N719 | 0.17  | 0.68  | 18a  |
| Graphite/Cb/ZrO <sub>2</sub> (CGM) | FTO glass | <i>p</i> -phenyl              | N719 | 0.57  | 4.87  | 18a  |
| Graphene/CGM(GGCM)                 | FTO glass | <i>p</i> -phenyl              | N719 | 0.66  | 5.65  | 18a  |
| Pt                                 | FTO glass | <i>p</i> -methylphenyl        | N719 | 0.15  | 0.66  | 18a  |
| CGM                                | FTO glass | <i>p</i> -methylphenyl        | N719 | 0.58  | 5.19  | 18a  |
| GGCM                               | FTO glass | <i>p</i> -methylphenyl        | N719 | 0.66  | 5.90  | 18a  |
| Pt                                 | FTO glass | <i>p</i> -methoxyphenyl       | N719 | 0.15  | 0.65  | 18a  |
| CGM                                | FTO glass | <i>p</i> -methoxyphenyl       | N719 | 0.57  | 5.25  | 18a  |
| GGCM                               | FTO glass | <i>p</i> -methoxyphenyl       | N719 | 0.66  | 6.14  | 18a  |
| GGCM <sup>[a]</sup>                | FTO glass | <i>p</i> -methoxyphenyl       | N719 | 0.66  | 6.53  | 18a  |
| Pt                                 | FTO glass | <i>p</i> -chlorophenyl        | N719 | 0.19  | 0.83  | 18a  |
| CGM                                | FTO glass | <i>p</i> -chlorophenyl        | N719 | 0.53  | 4.76  | 18a  |
| GGCM                               | FTO glass | <i>p</i> -chlorophenyl        | N719 | 0.60  | 5.45  | 18a  |
| Pt                                 | FTO glass | <i>p</i> -tfluoromethylphenyl | N719 | 0.15  | 0.36  | 18a  |
| CGM                                | FTO glass | <i>p</i> -tfluoromethylphenyl | N719 | 0.39  | 3.14  | 18a  |
| GGCM                               | FTO glass | <i>p</i> -tfluoromethylphenyl | N719 | 0.50  | 4.12  | 18a  |
| Pt                                 | FTO glass | <i>p</i> -nitrophenyl         | N719 | 0.10  | 0.15  | 18a  |
| CGM                                | FTO glass | <i>p</i> -nitrophenyl         | N719 | 0.55  | 2.74  | 18a  |
| GGCM                               | FTO glass | <i>p</i> -nitrophenyl         | N719 | 0.65  | 3.25  | 18a  |
| PEDOT <sub>BE</sub>                | FTO glass | <i>p</i> -phenyl              | N719 | 0.66  | 6.07  | 18b  |
| PEDOT <sub>UT</sub>                | FTO glass | <i>p</i> -phenyl              | N719 | 0.58  | 4.57  | 18b  |
| NiSP <sub>1</sub>                  | FTO glass | et                            | N719 | 0.68  | 6.25  | 18c  |
| Pt                                 | FTO glass | et                            | N719 | 0.50  | 3.98  | 18c  |
| MC                                 | FTO glass | et                            | N719 | 0.53  | 4.82  | 18d  |
| GMC                                | FTO glass | et                            | N719 | 0.69  | 6.55  | 18d  |
| PEDOT                              | FTO glass | <i>n</i> -bu                  | N719 | 0.620 | 4.25  | 18e  |
| PEDOT                              | FTO glass | <i>n</i> -hex                 | N719 | 0.634 | 4.32  | 18e  |
| PEDOT                              | FTO glass | <i>n</i> -oct                 | N719 | 0.574 | 3.61  | 18e  |

<sup>[a]</sup> After optimizing the concentration of the oxide state of the redox coupl

**Table S5.** Experimental conditions and results about the organic redox couples based DSCs using different counter electrode catalysts.

| CE     | Substrate | Redox couple                                              | Dye   | FF   | PCE/% | Ref |
|--------|-----------|-----------------------------------------------------------|-------|------|-------|-----|
| Pt     | FTO glass | McMT <sup>-</sup> /BMT, X <sup>+</sup> =TBA <sup>+</sup>  | TH305 | 0.68 | 5.1   | 19a |
| PEDOT  | FTO glass | McMT <sup>-</sup> /BMT, X <sup>+</sup> =TBA <sup>+</sup>  | TH305 | 0.65 | 6.0   | 19b |
| PEDOT  | FTO glass | McMT <sup>-</sup> /BMT, X <sup>+</sup> =EMI <sup>+</sup>  | TH305 | 0.37 | 0.7   | 19b |
| PEDOT  | FTO glass | McMT <sup>-</sup> /BMT, X <sup>+</sup> =DMHI <sup>+</sup> | TH305 | 0.19 | 0.1   | 19b |
| Pt     | FTO glass | A                                                         | TH305 | 0.35 | 3.3   | 19b |
| Pt     | FTO glass | B                                                         | TH305 | 0.18 | 0.6   | 19b |
| Pt     | FTO glass | C                                                         | TH305 | 0.10 | 0.2   | 19b |
| Pt     | FTO glass | D                                                         | TH305 | 0.19 | 1.6   | 19b |
| Pt     | FTO glass | T/DT <sup>2+</sup>                                        | N719  | 0.57 | 2.80  | 20  |
| CoS    | FTO glass | T/DT <sup>2+</sup>                                        | N719  | 0.65 | 3.99  | 20  |
| MWCNTs | FTO glass | T/DT <sup>2+</sup>                                        | N719  | 0.66 | 4.12  | 20  |
| Pt     | FTO glass | TMTU/TFMDS <sup>2+</sup>                                  | N3    | 0.29 | 0.60  | 21a |
| Cb     | FTO glass | TMTU/TFMDS <sup>2+</sup>                                  | N3    | 0.49 | 3.1   | 21a |

|    |           |                                |      |      |      |     |
|----|-----------|--------------------------------|------|------|------|-----|
| Cb | SS        | TMTU/TMFDS <sup>2+</sup>       | N3   | 0.32 | 1.6  | 21a |
| Cb | Al        | TMTU/TMFDS <sup>2+</sup>       | Z907 | 0.52 | 1.9  | 21a |
| Pt | FTO glass | TMTU/TMFDS <sup>2+</sup>       | Z907 | 0.28 | 0.37 | 21b |
| Pt | FTO glass | TMTU/TMFDS <sup>2+</sup>       | D131 | 0.24 | 2.08 | 21b |
| Cb | FTO glass | TMTU/TMFDS <sup>2+</sup>       | Z907 | 0.66 | 1.38 | 21b |
| Cb | FTO glass | TMTU/TMFDS <sup>2+</sup>       | D131 | 0.52 | 3.88 | 21b |
| Pt | FTO glass | M <sup>-</sup> /M <sub>2</sub> | N719 | 0.13 | 0.3  | 22  |
| Cb | FTO glass | M <sup>-</sup> /M <sub>2</sub> | N719 | 0.34 | 0.9  | 22  |
| Pt | FTO glass | M <sup>-</sup> /T <sub>2</sub> | N719 | 0.30 | 2.3  | 22  |
| Cb | FTO glass | M <sup>-</sup> /T <sub>2</sub> | N719 | 0.58 | 4.1  | 22  |
| Pt | FTO glass | T <sup>-</sup> /M <sub>2</sub> | N719 | 0.15 | 0.8  | 22  |
| Cb | FTO glass | T <sup>-</sup> /M <sub>2</sub> | N719 | 0.52 | 2.0  | 22  |

**Table S6.** Experimental conditions and results about the metal complex redox couples based DSCs using different counter electrode catalysts.

| CE catalysts                                | Substrate | Redox couple                                | Dye           | FF   | PCE/% | Ref |
|---------------------------------------------|-----------|---------------------------------------------|---------------|------|-------|-----|
| Pt                                          | FTO glass | FeCp <sub>2</sub> <sup>0/+</sup>            | Carbz-PAHTDTT | 0.73 | 7.50  | 23b |
| Pt                                          | FTO glass | Fe(CN) <sub>6</sub> <sup>4-/3-</sup>        | MK2           | 0.75 | 4.10  | 23c |
| Pt                                          | FTO glass | Cu(SP)(mmt)] <sup>-0</sup> ,                | N719          | 0.44 | 1.3   | 24a |
| Pt                                          | FTO glass | [Cu(dmp) <sub>2</sub> ] <sup>+2+</sup>      | N719          | 0.55 | 1.4   | 24a |
| Pt                                          | FTO glass | [Cu(phen) <sub>2</sub> ] <sup>+2+</sup>     | N719          | 0.43 | 0.12  | 24a |
| Pt                                          | FTO glass | [Cu(dmp) <sub>2</sub> ] <sup>+2+</sup>      | C218          | 0.66 | 7.0   | 24b |
| Au                                          | FTO glass | Ni <sup>3+/4+</sup>                         | N719          | \    | 1.50  | 25a |
| Pt                                          | FTO glass | oxovanadium(IV/IV)                          | D205/D131     | 0.59 | 5.40  | 26  |
| PEDOT                                       | FTO glass | [Mn(acac) <sub>3</sub> ] <sup>0/+</sup>     | MK2           | 0.69 | 4.4   | 27  |
| PEDOT                                       | FTO glass | [Mn(acac) <sub>3</sub> ] <sup>0/+</sup>     | N719          | 0.73 | 4.4   | 27  |
| PEDOT                                       | FTO glass | [Mn(acac) <sub>3</sub> ] <sup>0/+</sup>     | K4            | 0.75 | 3.2   | 27  |
| Au                                          | FTO glass | [Mn(acac) <sub>3</sub> ] <sup>0/+</sup>     | K4            | 0.74 | 2.6   | 27  |
| Pt                                          | FTO glass | [Mn(acac) <sub>3</sub> ] <sup>0/+</sup>     | K4            | 0.59 | 2.8   | 27  |
| Pt                                          | FTO glass | [Co(bpy) <sub>3</sub> ] <sup>2+/3+</sup>    | YD2-O-C8/Y123 | 0.74 | 12.3  | 28  |
| Ca                                          | FTO glass | [Co(dtbbpy) <sub>3</sub> ] <sup>2+/3+</sup> | YD2           | 0.66 | 4.05  | 31  |
| OMC                                         | FTO glass | [Co(dtbbpy) <sub>3</sub> ] <sup>2+/3+</sup> | YD2           | 0.65 | 3.43  | 31  |
| SWCNTs                                      | ITO PET   | [Co(bpy) <sub>3</sub> ] <sup>2+/3+</sup>    | D35           | 0.62 | 6.6   | 33  |
| GNP                                         | FTO glass | [Co(bpy) <sub>3</sub> ] <sup>2+/3+</sup>    | Y123          | 0.70 | 9.3   | 35a |
| GO                                          | FTO glass | [Co(bpy) <sub>3</sub> ] <sup>2+/3+</sup>    | Y123          | 0.67 | 9.3   | 37  |
| RGO-TaON                                    | FTO glass | [Co(bpy) <sub>3</sub> ] <sup>2+/3+</sup>    | FNE29         | 0.69 | 7.65  | 38  |
| RGO                                         | FTO glass | [Co(bpy) <sub>3</sub> ] <sup>2+/3+</sup>    | FNE29         | 0.46 | 4.62  | 38  |
| TaON                                        | FTO glass | [Co(bpy) <sub>3</sub> ] <sup>2+/3+</sup>    | FNE29         | 0.29 | 2.54  | 38  |
| AgNW-GNP                                    | FTO glass | [Co(bpy) <sub>3</sub> ] <sup>2+/3+</sup>    | N719          | 0.59 | 2.44  | 39  |
| NbO <sub>2</sub>                            | FTO glass | [Co(dtbbpy) <sub>3</sub> ] <sup>2+/3+</sup> | YD2           | 0.65 | 3.62  | 41  |
| TiC                                         | FTO glass | [Co(dtbbpy) <sub>3</sub> ] <sup>2+/3+</sup> | YD2           | 0.66 | 4.13  | 41  |
| FeS <sub>2</sub>                            | FTO glass | [Co(bpy) <sub>3</sub> ] <sup>2+/3+</sup>    | C128          | 0.69 | 6.34  | 41  |
| Co <sub>0.85</sub> Se                       | FTO glass | [Co(Mebpy) <sub>3</sub> ] <sup>2+/3+</sup>  | Z907          | 0.45 | 1.57  | 42  |
| Co <sub>0.85</sub> Se/Ni <sub>0.85</sub> Se | FTO glass | [Co(Mebpy) <sub>3</sub> ] <sup>2+/3+</sup>  | Z907          | 0.53 | 2.54  | 42  |
| PEDOT                                       | FTO glass | [Co(bpy) <sub>3</sub> ] <sup>2+/3+</sup>    | Y123          | 0.71 | 10.3  | 43a |
| PEDOT                                       | FTO glass | [Co(phen) <sub>3</sub> ] <sup>2+/3+</sup>   | Y123          | 0.69 | 9.5   | 43a |
| PProDOT                                     | FTO glass | [Co(bpy-pz) <sub>2</sub> ] <sup>2+/3+</sup> | Y123          | 0.77 | 10.08 | 44  |
| PANI                                        | FTO glass | [Co(bpy) <sub>3</sub> ] <sup>2+/3+</sup>    | FNE29         | 0.70 | 8.24  | 45  |

**Table S7.** Experimental conditions and results about the hole transport materials (HTM) based DSCs using different counter electrode catalysts.

| CE catalysts                      | HTM                                     | Dye       | FF   | PCE/%               | Ref. |
|-----------------------------------|-----------------------------------------|-----------|------|---------------------|------|
| Au                                | Sprio-OMeTAD                            | N719      | 0.62 | 0.74                | 49   |
| Ag                                | Sprio-OMeTAD                            | Y123      | 0.76 | 7.2                 | 50   |
| Pt                                | CsSnI <sub>2.95</sub> F <sub>0.05</sub> | N719      | 0.73 | 10.2                | 53   |
| Au                                | CuI                                     | Cyanidine | \    | 0.8                 | 47a  |
| Au                                | CuI                                     | N3        | \    | 3.75                | 54   |
| Au                                | Sprio-OMeTAD                            | D102      | 0.61 | 4.1                 | 55a  |
| Au                                | Sprio-OMeTAD                            | Z907      | 0.58 | 5.65                | 55b  |
| Au                                | PEDOT                                   | D149      | 0.75 | 6.1                 | 56   |
| Pt                                | P3HT                                    | D102      | 0.46 | 1.2                 | 57   |
| Pt                                | PEDOT                                   | N719      | 0.60 | 5.4                 | 58   |
| Ag                                | Sprio-OMeTAD                            | Z907      | 0.69 | 2.7                 | 61   |
| Ag/PEDOT:PSS                      | Sprio-OMeTAD                            | D35       | 0.60 | 3.7                 | 62   |
| Graphite                          | CuSCN                                   | N3        | 0.44 | 2.1                 | 63   |
| Cb/PEDOT:PSS                      | CuSCN                                   | N3        | 0.69 | 7.4                 | 64   |
| Graphite                          | P3HT                                    | D102      | 0.64 | 1.8                 | 65   |
| Graphite/Cb                       | P3HT                                    | D102      | 0.66 | 3.1                 | 65   |
| Graphite/Cb                       | Sprio-OMeTAD                            | D102      | 0.65 | 4.03                | 66   |
| V <sub>2</sub> O <sub>5</sub> /Al | Sprio-OMeTAD                            | Z907      | 0.34 | 2.0                 | 67   |
| ITO/Au                            | Sprio-OMeTAD                            | Z907      | 0.64 | 1.96                | 68   |
| ITO                               | Sprio-OMeTAD                            | D102      | 0.46 | 1.73 <sup>[a]</sup> | 69   |
| ITO                               | Sprio-OMeTAD                            | D102      | 0.56 | 1.06 <sup>[b]</sup> | 69   |

<sup>[a]</sup>front illumination, <sup>[b]</sup>rear illumination

**Table S8.** Experimental conditions and results about the QDSCs using different counter electrode catalysts.

| CE catalyst               | Substrate | Redox couple                                  | QDs                     | FF    | PCE/% | Ref. |
|---------------------------|-----------|-----------------------------------------------|-------------------------|-------|-------|------|
| Au                        | FTO glass | S <sup>2-</sup> /S <sub>x</sub> <sup>2-</sup> | CdS/CdSe                | 0.21  | 0.8   | 72a  |
| Pt                        | FTO glass | S <sup>2-</sup> /S <sub>x</sub> <sup>2-</sup> | CdS/CdSe                | 0.26  | 2.1   | 72a  |
| Au/Pt                     | FTO glass | S <sup>2-</sup> /S <sub>x</sub> <sup>2-</sup> | CdS/CdSe                | 0.31  | 2.4   | 72a  |
| Pt/CuS                    | FTO glass | S <sup>2-</sup> /S <sub>x</sub> <sup>2-</sup> | CdS                     | 0.50  | 2.27  | 72b  |
| Pt                        | FTO glass | TMTU/TMFDS <sup>2+</sup>                      | ZnSe/CdS                | 0.58  | 0.86  | 72c  |
| Pt                        | FTO glass | McMT <sup>-</sup> /BMT                        | CdS                     | 0.47  | 0.6   | 72d  |
| Pt                        | FTO glass | Mn <sup>2+/3+</sup>                           | CdS/CdSe                | 0.55  | 0.33  | 72e  |
| Pt                        | FTO glass | Co <sup>2+/3+</sup>                           | CdS/CdSe                | 0.45  | 0.22  | 72e  |
| Cu <sub>2</sub> S         | Brass     | S <sup>2-</sup> /S <sub>x</sub> <sup>2-</sup> | CdSe                    | 0.576 | 5.41  | 74a  |
| Cu <sub>2</sub> S         | FTO glass | S <sup>2-</sup> /S <sub>x</sub> <sup>2-</sup> | CdSe                    | 0.555 | 5.21  | 74a  |
| CuS nanosheet             | FTO glass | S <sup>2-</sup> /S <sub>x</sub> <sup>2-</sup> | CdS/CdSe                | 0.44  | 3.65  | 74b  |
| Cu <sub>2</sub> S mesh    | FTO glass | S <sup>2-</sup> /S <sub>x</sub> <sup>2-</sup> | CdS/CdSe                | 0.60  | 3.65  | 74d  |
| Cu <sub>2</sub> S nanorod | Coper     | S <sup>2-</sup> /S <sub>x</sub> <sup>2-</sup> | CuInS <sub>2</sub> /CdS | 0.417 | 4.13  | 74e  |
| Cu <sub>1.8</sub> S       | FTO glass | S <sup>2-</sup> /S <sub>x</sub> <sup>2-</sup> | ZnSe/CdSe               | 0.423 | 3.65  | 75a  |
| Cu <sub>1.8</sub> S/CuS   | FTO glass | S <sup>2-</sup> /S <sub>x</sub> <sup>2-</sup> | CdS                     | 0.564 | 1.66  | 75b  |
| c-Cu <sub>x</sub> S       | FTO glass | S <sup>2-</sup> /S <sub>x</sub> <sup>2-</sup> | CdS/CdSe                | 0.511 | 2.77  | 75c  |
| p-Cu <sub>x</sub> S       | FTO glass | S <sup>2-</sup> /S <sub>x</sub> <sup>2-</sup> | CdS/CdSe                | 0.533 | 3.17  | 75c  |

|                                                                          |              |                                             |           |       |      |     |
|--------------------------------------------------------------------------|--------------|---------------------------------------------|-----------|-------|------|-----|
| PbS                                                                      | Pb           | $S^{2-}/S_x^{2-}$                           | CdSe      | 0.588 | 3.01 | 76a |
| Mn doped PbS                                                             | FTO glass    | $S^{2-}/S_x^{2-}$                           | CdS/CdSe  | 0.51  | 3.61 | 76b |
| NiS                                                                      | FTO glass    | $S^{2-}/S_x^{2-}$                           | CdS/CdSe  | 0.48  | 3.30 | 77a |
| s-Fe <sub>2</sub> S                                                      | FTO glass    | $S^{2-}/S_x^{2-}$                           | ZnSe/CdSe | 0.361 | 3.50 | 78a |
| m-Fe <sub>2</sub> S                                                      | FTO glass    | $S^{2-}/S_x^{2-}$                           | ZnSe/CdSe | 0.387 | 3.90 | 78a |
| FeS/Fe <sub>3</sub> S <sub>4</sub> /Fe <sub>2</sub> S                    | Carbon steel | $S^{2-}/S_x^{2-}$                           | CdS/CdSe  | 0.43  | 1.76 | 78b |
| FeS                                                                      | Carbon steel | $S^{2-}/S_x^{2-}$                           | CdS/CdSe  | 0.40  | 3.34 | 78c |
| MoS <sub>2</sub>                                                         | FTO glass    | $S^{2-}/S_x^{2-}$                           | CdS       | 0.41  | 1.21 | 79a |
| Bi <sub>2</sub> S <sub>3</sub>                                           | FTO glass    | $S^{2-}/S_x^{2-}$                           | CdSe      | 0.289 | 2.20 | 79b |
| CoS                                                                      | FTO glass    | $S^{2-}/S_x^{2-}$                           | CdS/CdSe  | 0.32  | 1.90 | 79c |
| Pt                                                                       | FTO glass    | I <sup>-</sup> /I <sub>3</sub> <sup>-</sup> | SnS       | 0.65  | 0.99 | 80a |
| TiC                                                                      | FTO glass    | I <sup>-</sup> /I <sub>3</sub> <sup>-</sup> | SnS       | 0.66  | 1.05 | 80a |
| SnS                                                                      | FTO glass    | I <sup>-</sup> /I <sub>3</sub> <sup>-</sup> | SnS       | 0.39  | 0.57 | 80a |
| Pt                                                                       | FTO glass    | T <sup>-</sup> /T <sub>2</sub>              | SnS       | 0.42  | 0.85 | 80a |
| TiC                                                                      | FTO glass    | T <sup>-</sup> /T <sub>2</sub>              | SnS       | 0.45  | 1.03 | 80a |
| TiC                                                                      | FTO glass    | $S^{2-}/S_x^{2-}$                           | SnS       | 0.51  | 0.16 | 80a |
| TiN                                                                      | FTO glass    | $S^{2-}/S_x^{2-}$                           | CdS/CdSe  | 0.20  | 0.80 | 80b |
| Pt                                                                       | FTO glass    | $S^{2-}/S_x^{2-}$                           | CdSe      | 0.33  | 2.29 | 81a |
| OMPC                                                                     | FTO glass    | $S^{2-}/S_x^{2-}$                           | CdSe      | 0.56  | 4.36 | 81a |
| Ca                                                                       | FTO glass    | $S^{2-}/S_x^{2-}$                           | CdSe      | 0.46  | 3.30 | 81a |
| Pt                                                                       | FTO glass    | I <sup>-</sup> /I <sub>3</sub> <sup>-</sup> | CdS       | 0.202 | 0.48 | 81b |
| Pt                                                                       | FTO glass    | $S^{2-}/S_x^{2-}$                           | CdS       | 0.492 | 1.05 | 81b |
| HCMSC                                                                    | FTO glass    | $S^{2-}/S_x^{2-}$                           | CdS       | 0.467 | 1.08 | 81b |
| CMK                                                                      | FTO glass    | $S^{2-}/S_x^{2-}$                           | CdS       | 0.428 | 0.67 | 81b |
| Carbon foam                                                              | FTO glass    | $S^{2-}/S_x^{2-}$                           | CdS/CdSe  | 0.50  | 1.75 | 81c |
| Carbon foam <sup>[a]</sup>                                               | FTO glass    | $S^{2-}/S_x^{2-}$                           | CdS/CdSe  | 0.42  | 3.60 | 81d |
| Au <sup>[a]</sup>                                                        | FTO glass    | $S^{2-}/S_x^{2-}$                           | CdS/CdSe  | 0.39  | 3.16 | 81d |
| CNF                                                                      | FTO glass    | $S^{2-}/S_x^{2-}$                           | CdS/CdSe  | 0.562 | 2.50 | 81e |
| HCNPs                                                                    | FTO glass    | $S^{2-}/S_x^{2-}$                           | CdS/CdSe  | 0.38  | 1.45 | 81f |
| N-HCNPs                                                                  | FTO glass    | $S^{2-}/S_x^{2-}$                           | CdS/CdSe  | 0.40  | 2.67 | 81f |
| CNTs                                                                     | FTO glass    | $S^{2-}/S_x^{2-}$                           | CdS/CdSe  | 0.47  | 2.09 | 81f |
| Pt                                                                       | ITO glass    | $S^{2-}/S_x^{2-}$                           | CdS       | 0.26  | 0.09 | 82a |
| PPy                                                                      | ITO glass    | $S^{2-}/S_x^{2-}$                           | CdS       | 0.27  | 0.41 | 82a |
| PEDOT                                                                    | ITO glass    | $S^{2-}/S_x^{2-}$                           | CdS       | 0.50  | 1.35 | 82a |
| Pt                                                                       | FTO glass    | AT-/BAT                                     | CdS       | 0.55  | 0.52 | 82b |
| CoS                                                                      | FTO glass    | AT-/BAT                                     | CdS       | 0.59  | 1.42 | 82b |
| PEDOT                                                                    | FTO glass    | AT-/BAT                                     | CdS       | 0.72  | 1.53 | 82b |
| PEDOT                                                                    | FTO glass    | T-/T <sub>2</sub>                           | CdS       | 0.72  | 1.22 | 82b |
| CuSnS <sub>3</sub>                                                       | FTO glass    | $S^{2-}/S_x^{2-}$                           | ZnSe/CdSe | 0.437 | 4.06 | 75a |
| CZTS                                                                     | FTO glass    | $S^{2-}/S_x^{2-}$                           | CdSe      | 0.40  | 2.19 | 83a |
| CZTSe                                                                    | FTO glass    | $S^{2-}/S_x^{2-}$                           | CdSe      | 0.52  | 4.35 | 83a |
| Cu <sub>2</sub> ZnSn(S <sub>0.2</sub> Se <sub>0.8</sub> ) <sub>4</sub>   | FTO glass    | $S^{2-}/S_x^{2-}$                           | CdS/CdSe  | 0.341 | 1.89 | 83c |
| Cu <sub>2</sub> ZnSn(S <sub>0.5</sub> Se <sub>0.5</sub> ) <sub>4</sub>   | FTO glass    | $S^{2-}/S_x^{2-}$                           | CdS/CdSe  | 0.43  | 3.01 | 83c |
| Cu <sub>2</sub> ZnSn(S <sub>0.85</sub> Se <sub>0.15</sub> ) <sub>4</sub> | FTO glass    | $S^{2-}/S_x^{2-}$                           | CdS/CdSe  | 0.299 | 1.31 | 83c |
| Amorphous NiCo <sub>2</sub> S <sub>4</sub>                               | FTO glass    | $S^{2-}/S_x^{2-}$                           | CdSe      | 0.283 | 1.61 | 83d |
| Hollow NiCo <sub>2</sub> S <sub>4</sub>                                  | FTO glass    | $S^{2-}/S_x^{2-}$                           | CdSe      | 0.489 | 4.22 | 83d |
| Pt/RG                                                                    | Graphite     | $S^{2-}/S_x^{2-}$                           | CdS       | 0.381 | 1.36 | 84  |
| Cu <sub>2</sub> S/ITO                                                    | FTO glass    | $S^{2-}/S_x^{2-}$                           | CdS/CdSe  | 0.525 | 4.06 | 85a |
| CuS/Cf                                                                   | FTO glass    | $S^{2-}/S_x^{2-}$                           | CdS/CdSe  | 0.507 | 3.86 | 85b |

|                                    |           |                                               |          |       |      |     |
|------------------------------------|-----------|-----------------------------------------------|----------|-------|------|-----|
| PbS/Cb                             | FTO glass | S <sup>2-</sup> /S <sub>x</sub> <sup>2-</sup> | CdS/CdSe | 0.58  | 3.91 | 86a |
| PbS/Graphene                       | FTO glass | S <sup>2-</sup> /S <sub>x</sub> <sup>2-</sup> | CdS/CdSe | 0.42  | 2.63 | 86b |
| PbS/ZnO nanorod                    | FTO glass | S <sup>2-</sup> /S <sub>x</sub> <sup>2-</sup> | CdSe     | 0.527 | 3.06 | 86c |
| CoS/graphene                       | FTO glass | S <sup>2-</sup> /S <sub>x</sub> <sup>2-</sup> | CdS/CdSe | \     | 2.9  | 87a |
| CoS/Graphite                       | Graphite  | S <sup>2-</sup> /S <sub>x</sub> <sup>2-</sup> | CdS/CdSe | 0.36  | 2.70 | 87b |
| Co <sub>9</sub> S <sub>8</sub> /Cf | Cf        | S <sup>2-</sup> /S <sub>x</sub> <sup>2-</sup> | CdS/CdSe | 0.57  | 3.79 | 87c |
| FTO/CoS/NiS                        | FTO glass | S <sup>2-</sup> /S <sub>x</sub> <sup>2-</sup> | CdS/CdSe | 0.53  | 3.40 | 87d |
| FTO/NiS/CoS                        | FTO glass | S <sup>2-</sup> /S <sub>x</sub> <sup>2-</sup> | CdS/CdSe | 0.49  | 2.35 | 87d |
| CuInS <sub>2</sub>                 | FTO glass | S <sup>2-</sup> /S <sub>x</sub> <sup>2-</sup> | CdS/CdSe | 0.52  | 3.63 | 88a |
| CuInS <sub>2</sub> /Ca/Cb          | FTO glass | S <sup>2-</sup> /S <sub>x</sub> <sup>2-</sup> | CdS/CdSe | 0.60  | 4.32 | 88a |
| CZTSe/MWCNTs                       | FTO glass | S <sup>2-</sup> /S <sub>x</sub> <sup>2-</sup> | CdSe     | 0.51  | 4.60 | 88b |
| PEDOT/TiO <sub>2</sub>             | FTO glass | S <sup>2-</sup> /S <sub>x</sub> <sup>2-</sup> | CdSe     | 0.67  | 1.56 | 89  |

<sup>[a]</sup>The QDSCs using ZnO nanowire photoanode
